# Supplementary material for: Carbene–pyridine chelating 2Fe2S hydrogenase model complexes as highly active catalysts for the electrochemical reduction of protons from weak acid (HOAc)
Source: Royal Society of Chemistry journal article supplement (doi:10.1039/b616645h), 2007-01-01
Supplement: b616645h.pdf [file b616645h.pdf]

Supporting Information:

Legends for Fig. S1–3

Fig. S1 Cyclic voltammograms of complex **6** with 1.0 mM complex and 0–10 mM HOAc in a CH<sub>3</sub>CN solution (0.1 M *n*Bu<sub>4</sub>NPF<sub>6</sub>) at a scan rate of 100 mV s<sup>-1</sup>.

Fig. S2 Cyclic voltammograms of complex **7** with 1.0 mM complex and 0–10 mM HOAc in a CH<sub>3</sub>CN solution (0.1 M *n*Bu<sub>4</sub>NPF<sub>6</sub>) at a scan rate of 100 mV s<sup>-1</sup>.

Fig. S3 Cyclic voltammogram of complex **8** with 1.0 mM complex in a CH<sub>3</sub>CN solution (0.1 M *n*Bu<sub>4</sub>NPF<sub>6</sub>) at a scan rate of 100 mV s<sup>-1</sup>.

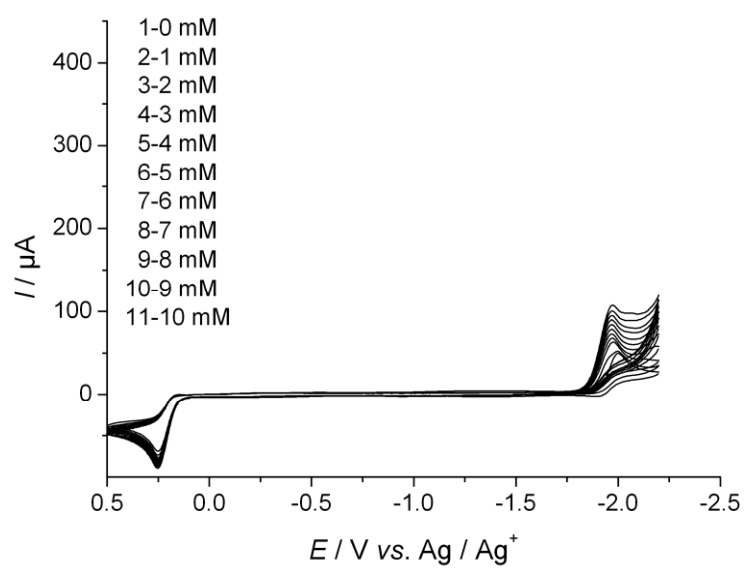

Fig. S1

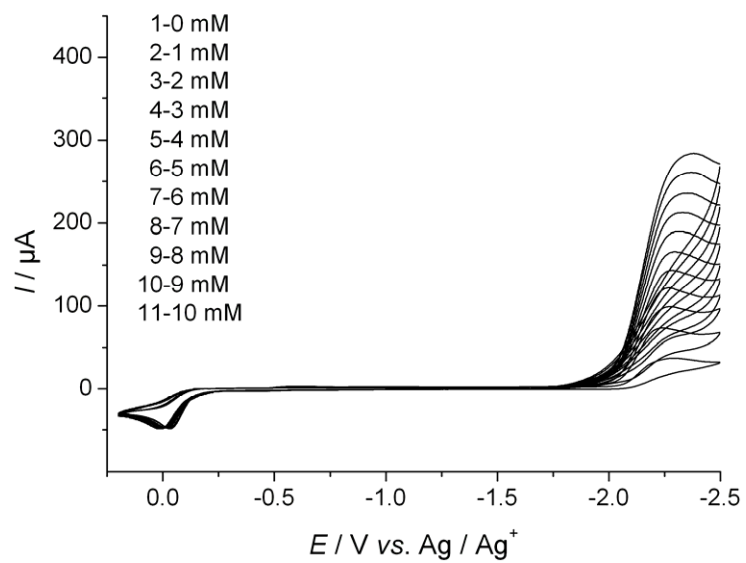

Fig. S2

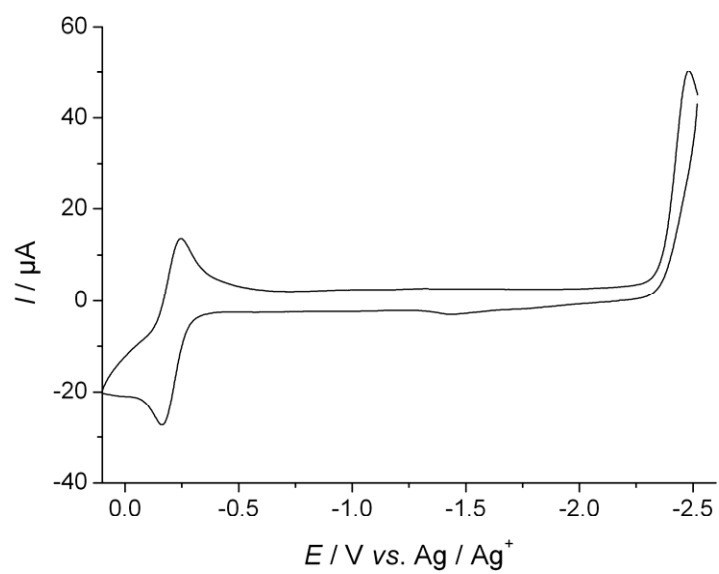

Fig. S3
